# Supplementary material for: Effect of Adding Bifidobacterium animalis BZ25 on the Flavor, Functional Components and Biogenic Amines of Natto by Bacillus subtilis GUTU09
Source: MDPI journal article supplement (doi:10.3390/foods11172674), 2022-09-02
Supplement: s1 [file s1]

Table S1 Concentration of volatile substances in steamed soybean samples (SS), in soybean fermented by BZ25 (SFB), natto fermented by GUTU09 (NMB), and natto fermented by two-strain (NMBB)

| Category | Name                                          | Concentration(ug/L)     |                         |                           |                             |
|----------|-----------------------------------------------|-------------------------|-------------------------|---------------------------|-----------------------------|
|          |                                               | SS                      | SFB                     | NMB                       | NMBB                        |
| Amines   | N,N-dimethyl-methylamine                      | -                       | -                       | 161.65±14.32 <sup>a</sup> | -                           |
|          | Formamide                                     | -                       | -                       | 6.23±3.6 <sup>a</sup>     | -                           |
|          | 3-Methyl-butanamide                           | -                       | -                       | 8.6±0.72 <sup>a</sup>     | -                           |
|          | Ethosuximide                                  | -                       | -                       | 9.19±0.83 <sup>a</sup>    | -                           |
| Esters   | Hexanoic acid ethyl ester                     | 14.2±7 <sup>c</sup>     | 29.77±4 <sup>c</sup>    | 580.19±32.12 <sup>b</sup> | 5410.47±123.89 <sup>a</sup> |
|          | Octanoic acid ethyl ester                     | 13.1±5 <sup>d</sup>     | 366.07±21 <sup>a</sup>  | 50.07±1.97 <sup>c</sup>   | 255.57±24.42 <sup>b</sup>   |
|          | Benzoic acid ethyl ester                      | 115.5±32 <sup>a</sup>   | 143.38±16 <sup>a</sup>  | -                         | 9.42±1.37 <sup>b</sup>      |
|          | 2-Methyl-propanoic acid, ethyl ester          | 2858.2±100 <sup>a</sup> | -                       | 165.76±4.63 <sup>b</sup>  | 172.33±21.38 <sup>b</sup>   |
|          | 3-Methyl-butanoic acid ethyl ester            | -                       | -                       | -                         | 12.99±0.71 <sup>a</sup>     |
|          | Hexadecanoic acid methyl ester                | -                       | 14.22±3 <sup>b</sup>    | -                         | 129.43±21.14 <sup>a</sup>   |
|          | 2-Methyl-butanoic acid ethyl ester            | -                       | 27±0.3 <sup>c</sup>     | 83.77±5.47 <sup>b</sup>   | 181.91±31.21 <sup>a</sup>   |
|          | Heptanoic acid ethyl ester                    | -                       | 29.47±2.5 <sup>b</sup>  | 1.38±0.51 <sup>c</sup>    | 77.64±23.15 <sup>a</sup>    |
|          | Ethylphenyl acetate                           | 6731.2±450 <sup>a</sup> | 1083.81±48 <sup>c</sup> | 4924.8±39.72 <sup>b</sup> | 539.57±31.25 <sup>d</sup>   |
|          | 2,2,4-Trimethyl-1,3-pentanediol diisobutyrate | -                       | -                       | 17.78±3.42 <sup>a</sup>   | 17.72±2.34 <sup>a</sup>     |
|          | Benzeneacetic acid methyl ester               | -                       | 215.54±31 <sup>a</sup>  | 187.38±32.26 <sup>a</sup> | -                           |
|          | Diethyl-acetic acid                           | -                       | -                       | 2662.1±47.2 <sup>a</sup>  | -                           |
|          | γ-Butyrolactone                               | 441.2±45 <sup>a</sup>   | -                       | -                         | -                           |
|          | Ethanedioic acid, diethyl ester               | 848.2±61 <sup>a</sup>   | -                       | -                         | -                           |
|          | 2-Butenoic acid, 2-propenyl ester             | 167.1±35 <sup>a</sup>   | -                       | -                         | -                           |
|          | 4-Isobutylbutanolide                          | -                       | 400.82±34 <sup>b</sup>  | 961.93±33.75 <sup>a</sup> | 6.27±0.35 <sup>c</sup>      |

|           |                                        |                          |                              |                              |                              |
|-----------|----------------------------------------|--------------------------|------------------------------|------------------------------|------------------------------|
|           | Oxirane-2-carboxylic acid, ethyl ester | -                        | -                            | -                            | 1100.91±45.23 <sup>a</sup>   |
| Pyrazines | Trimethyl-pyrazine                     | 3833.8±233 <sup>c</sup>  | 3452.16±231 <sup>c</sup>     | 5938.15±135.23 <sup>b</sup>  | 16423.69±345.23 <sup>a</sup> |
|           | 2,5-Dimethyl-pyrazine                  | 9363±600 <sup>b</sup>    | 2377.69±123 <sup>c</sup>     | 8822.82±219.78 <sup>b</sup>  | 23981.63±421.8 <sup>a</sup>  |
|           | 2-Ethyl-3,5-dimethyl-pyrazine          | 16.9±3.2 <sup>c</sup>    | 556.81±43 <sup>b</sup>       | 1363.53±43.56 <sup>a</sup>   | 72.35±22.32 <sup>c</sup>     |
|           | 2-Ethyl-5-methyl-pyrazine              | -                        | 128.38±21 <sup>b</sup>       | 154.73±2.54 <sup>a</sup>     | 119.1±13.43 <sup>b</sup>     |
|           | Tetramethyl-pyrazine                   | -                        | 825.9±31 <sup>c</sup>        | 1610.35±41.24 <sup>b</sup>   | 3474.49±123.23 <sup>a</sup>  |
|           | Pyrazine                               | 2054.1±89.2 <sup>a</sup> | 244.88±26 <sup>b</sup>       | -                            | 19±2.34 <sup>c</sup>         |
|           | Methyl-pyrazine                        | 638±41 <sup>a</sup>      | -                            | 278.95±31.24 <sup>b</sup>    | 147.91±22.14 <sup>c</sup>    |
|           | 2-Ethenyl-6-methyl- pyrazine           | -                        | 2.17±0.5 <sup>b</sup>        | -                            | 319±35.33 <sup>a</sup>       |
|           | 2,3,5-Trimethyl-6-ethylpyrazine        | -                        | 525.95±16 <sup>b</sup>       | 156.93±13.26 <sup>c</sup>    | 672.54±35.28 <sup>a</sup>    |
| Ketones   | 3-Hydroxy-2-butanone                   | 292.4±50 <sup>d</sup>    | 47154.9±567 <sup>a</sup>     | 30944.69±750.37 <sup>b</sup> | 15988.37±332.89 <sup>c</sup> |
|           | 5-Methyl-2-hexanone                    | 73.5±21 <sup>c</sup>     | 185.17±17 <sup>c</sup>       | 1511.21±100.23 <sup>a</sup>  | 970.81±67.25 <sup>b</sup>    |
|           | 2-Hexadecanone                         | 88.2±18 <sup>c</sup>     | 31.77±1.1 <sup>d</sup>       | 241.02±21.32 <sup>b</sup>    | 526.66±34.89 <sup>a</sup>    |
|           | 2,3-Butanedione                        | -                        | 165.14±19 <sup>b</sup>       | -                            | 3219.12±216.78 <sup>a</sup>  |
|           | 2-Nonanone                             | 130.3±19 <sup>b</sup>    | 1355.71±25.1 <sup>a</sup>    | 1474.72±47.12 <sup>a</sup>   | 1482.05±134.37 <sup>a</sup>  |
|           | 1-Phenyl-ethanone                      | 50.8±12 <sup>c</sup>     | 95.54±12.1 <sup>b</sup>      | 36.07±2.12 <sup>c</sup>      | 435.83±32.87 <sup>a</sup>    |
|           | 2-Heptanone                            | 1297.1±46 <sup>b</sup>   | 2376.09±89 <sup>a</sup>      | 981.69±45.37 <sup>c</sup>    | -                            |
|           | 3-Octanone                             | 783±49 <sup>a</sup>      | 31.21±1.9 <sup>c</sup>       | 223.71±33.42 <sup>b</sup>    | -                            |
|           | 2,3-Pentanedione                       | 187.3±21 <sup>b</sup>    | 334.78±17 <sup>a</sup>       | 198.63±32.21 <sup>b</sup>    | -                            |
|           | Acetone                                | 27587.6±90 <sup>a</sup>  | 17081.25±368.76 <sup>b</sup> | 7743.08±79.91 <sup>c</sup>   | -                            |
|           | 2-Hydroxy-3-pentanone                  | -                        | 160.03±15.65 <sup>c</sup>    | 675.69±32.27 <sup>a</sup>    | 331.93±45.78 <sup>b</sup>    |
|           | 2,6-Dimethyl-4-heptanone               | -                        | 2.63±0.8 <sup>b</sup>        | 177.17±27.17 <sup>a</sup>    | 181.98±34.89 <sup>a</sup>    |
|           | 1-(4-Methylphenyl)-ethanone            | 46.8±10 <sup>a</sup>     | 4.82±0.56 <sup>c</sup>       | -                            | 15.63±2.35 <sup>b</sup>      |
|           | 3-Hydroxy-4-phenyl-2-butanone          | -                        | -                            | 6.14±3.24 <sup>b</sup>       | 130.74±34.56 <sup>a</sup>    |

|       |                                   |                         |                            |                             |                             |
|-------|-----------------------------------|-------------------------|----------------------------|-----------------------------|-----------------------------|
|       | 4-Methyl-3-penten-2-one           | -                       | 311.23±23.91 <sup>a</sup>  | 109.12±12.11 <sup>b</sup>   | -                           |
|       | 2-Butanone                        | 2219.7±145 <sup>b</sup> | -                          | 3875.48±72.67 <sup>a</sup>  | -                           |
|       | 3-Pentanone                       | 8061±212 <sup>a</sup>   | -                          | -                           | -                           |
|       | 1-Octen-3-one                     | 1089.7±134 <sup>a</sup> | -                          | -                           | -                           |
|       | 6-Methyl-5-hepten-2-one           | 1065.1±146 <sup>a</sup> | -                          | -                           | -                           |
|       | 3-Hydroxy-2-methyl-4H-pyran-4-one | -                       | -                          | -                           | 2880.75±156.78 <sup>a</sup> |
|       | 3-Hydroxy-3-methyl-2-Butanone     | 176.4±21 <sup>b</sup>   | 41.6±3.42 <sup>bc</sup>    | -                           | 1586.05±145.78 <sup>a</sup> |
|       | 5-Methyl-2-heptanone              | -                       | -                          | 445.92±21.79 <sup>b</sup>   | 961.25±35.67 <sup>a</sup>   |
| Acids | Acetic acid                       | 6305.4±309 <sup>b</sup> | 9303.7±104.32 <sup>a</sup> | 3072.77±125.21 <sup>d</sup> | 3919.93±312.67 <sup>c</sup> |
|       | 2-Ethyl-butanoic acid             | -                       | -                          | 2662.1±56.73 <sup>a</sup>   | 682.54±43.47 <sup>b</sup>   |
|       | 2-Methyl-butanoic acid            | 886.8±52 <sup>c</sup>   | 703.65±32.35 <sup>c</sup>  | 3626.2±95.23 <sup>b</sup>   | 5349.15±348.67 <sup>a</sup> |
|       | 2-Methyl- Propanoic acid          | 242.7±31 <sup>c</sup>   | 513.49±35.67 <sup>c</sup>  | 2409.88±72.12 <sup>a</sup>  | 2039.66±134.78 <sup>b</sup> |
|       | (R)-(-)-4-Methylhexanoic acid     | -                       | 17.42±2.13 <sup>bc</sup>   | 39.05±2.89 <sup>b</sup>     | 463.12±34.89 <sup>a</sup>   |
|       | Octanoic acid                     | 8.6±1 <sup>c</sup>      | 89.8±3.2 <sup>b</sup>      | 14.78±1.78 <sup>c</sup>     | 112.23±18.93 <sup>a</sup>   |
|       | Benzoic acid                      | 7811±342 <sup>a</sup>   | 6636.8±157.8 <sup>b</sup>  | 2831.72±79.36 <sup>c</sup>  | 191.82±18.98 <sup>d</sup>   |
|       | Benzeneacetic acid                | -                       | 6.79±1.12 <sup>b</sup>     | 12.89±1.79 <sup>b</sup>     | 186.66±36.27 <sup>a</sup>   |
|       | Octadecanoic acid                 | -                       | -                          | -                           | 1037.58±127.89 <sup>a</sup> |
|       | n-Hexadecanoic acid               | 404.8±35 <sup>a</sup>   | -                          | 310.8±21.9 <sup>b</sup>     | -                           |
|       | 3-Methyl-2-butenic acid           | -                       | 33.16±2.47 <sup>b</sup>    | 214.23±19.09 <sup>a</sup>   | -                           |
|       | Hexanoic acid                     | 344.9±21 <sup>b</sup>   | 740.04±15.86 <sup>a</sup>  | 114.02±16.43 <sup>c</sup>   | -                           |
|       | Propanoic acid                    | -                       | 980.37±35.42 <sup>a</sup>  | 255.21±23.43 <sup>b</sup>   | -                           |
|       | Formic acid                       | 555±46 <sup>a</sup>     | 64.21±12.21 <sup>b</sup>   | -                           | -                           |
|       | 3-Methyl-butanoic acid            | 885.5±67 <sup>b</sup>   | 2265.9±36.72 <sup>a</sup>  | -                           | -                           |
|       | 4-Methyl-pentanoic acid           | 30.8±11 <sup>b</sup>    | -                          | 111.68±17.34 <sup>a</sup>   | -                           |

|           |                           |                         |                             |                            |                             |
|-----------|---------------------------|-------------------------|-----------------------------|----------------------------|-----------------------------|
|           | 4-Hydroxy-butanoic acid   | -                       | 296.84±16.21 <sup>a</sup>   | -                          | 134.73±16.78 <sup>b</sup>   |
|           | Decanal                   | 551.2±25 <sup>b</sup>   | 373.92±34.42 <sup>c</sup>   | -                          | 667.46±35.45 <sup>a</sup>   |
|           | Nonanal                   | 482.3±22 <sup>b</sup>   | 384.56±39.42 <sup>c</sup>   | 125.14±14.32 <sup>d</sup>  | 862.21±56.89 <sup>a</sup>   |
|           | 3-Methyl-butanal          | 15944±323 <sup>a</sup>  | -                           | 501.05±45.35 <sup>b</sup>  | -                           |
|           | 2-Methyl-butanal          | -                       | -                           | 540.18±16.32 <sup>a</sup>  | -                           |
|           | Octanal                   | 284.7±21 <sup>a</sup>   | -                           | 107.83±11.23 <sup>b</sup>  | -                           |
| Aldehydes | Phenylacetaldehyde        | 435.1±45 <sup>a</sup>   | 163.6±14.75 <sup>b</sup>    | 118.3±16.78 <sup>b</sup>   | -                           |
|           | Furfural                  | 1822.7±357 <sup>a</sup> | 264.79±24.86 <sup>b</sup>   | -                          | -                           |
|           | Benzaldehyde              | 6799.8±345 <sup>a</sup> | 2084.12±46.77 <sup>b</sup>  | 2212.72±45.37 <sup>b</sup> | -                           |
|           | Hexanal                   | 4996.8±231 <sup>a</sup> | 142.14±13.96 <sup>b</sup>   | 52.64±10.23 <sup>b</sup>   | -                           |
|           | Heptanal                  | 1297.1±127 <sup>a</sup> | -                           | -                          | -                           |
|           | 2,4-Dimethyl-benzaldehyde | 7.4±1.5 <sup>c</sup>    | 296.84±21.76 <sup>c</sup>   | 2.58±0.9 <sup>b</sup>      | 388.14±45.53 <sup>a</sup>   |
|           | 1-Octen-3-ol              | 1680.1±114 <sup>b</sup> | 128.04±13.25 <sup>c</sup>   | 59.45±4.56 <sup>c</sup>    | 9305.75±321.22 <sup>a</sup> |
|           | Trans-geraniol            | -                       | 228.8±21.24 <sup>a</sup>    | -                          | 207.48±34.12 <sup>a</sup>   |
|           | 3-Octanol                 | -                       | 128.04±13.42 <sup>b</sup>   | -                          | 702.78±34.36 <sup>a</sup>   |
|           | 1-Hexanol                 | -                       | 1763.54±128.37 <sup>a</sup> | -                          | 418.62±29.56 <sup>b</sup>   |
|           | 2-Ethyl-1-hexanol         | -                       | 171.26±4.39 <sup>b</sup>    | -                          | 719.76±30.89 <sup>a</sup>   |
|           | Ethanol                   | -                       | -                           | -                          | 2490.17±320.37 <sup>a</sup> |
| Alcohols  | 1-Nonanol                 | -                       | -                           | 118.3±21.23 <sup>a</sup>   | 113.08±12.89 <sup>a</sup>   |
|           | 3-Ethyl-3-pentanol        | -                       | -                           | -                          | 44.14±12.29 <sup>a</sup>    |
|           | 2-Methyl-3-hexanol        | -                       | -                           | 854.58±23.67 <sup>a</sup>  | -                           |
|           | 1-Butanol                 | -                       | 35.74±2.72 <sup>a</sup>     | 10.84±0.85 <sup>b</sup>    | 10.05±2.8 <sup>b</sup>      |
|           | 5-Methyl-2-hexanol        | -                       | -                           | 157.39±13.36 <sup>a</sup>  | 44.08±11.9 <sup>b</sup>     |
|           | Phenylethyl alcohol       | -                       | -                           | 111.35±18.34 <sup>b</sup>  | 671.37±23.47 <sup>a</sup>   |
|           | 1-Hexadecanol             | -                       | 41.37±3.62 <sup>a</sup>     | -                          | 49.41±23.43 <sup>a</sup>    |

|           |                                     |                          |                           |                             |                            |
|-----------|-------------------------------------|--------------------------|---------------------------|-----------------------------|----------------------------|
|           | 2-Heptanol                          | -                        | 111.84±12.43 <sup>a</sup> | -                           | 12.22±2.33 <sup>c</sup>    |
|           | 2,3-Butanediol                      | -                        | 592.05±34.27 <sup>b</sup> | 30.76±2.47 <sup>c</sup>     | 2787.28±34.26 <sup>a</sup> |
|           | 1-Octanol                           | -                        | -                         | 29.66±3.66 <sup>b</sup>     | 303.27±17.31 <sup>a</sup>  |
|           | 1-Nonen-3-ol                        | 2212.7±45 <sup>a</sup>   | -                         | -                           | -                          |
|           | Benzyl alcohol                      | -                        | -                         | -                           | 648.34±21.56 <sup>a</sup>  |
|           | 2-Phenoxy-ethanol                   | -                        | -                         | 356.24±23.67 <sup>a</sup>   | 52.32±13.42 <sup>b</sup>   |
|           | Eucalyptol                          | 336.2±23 <sup>a</sup>    | -                         | -                           | -                          |
|           | (Z)-3-Methyl-2-pentenol             | 0 <sup>b</sup>           | 163.6±31.26 <sup>a</sup>  | 0 <sup>b</sup>              | 173.13±23.45 <sup>a</sup>  |
| Aromatics | 2-Methoxy-phenol                    | 697.3±37 <sup>c</sup>    | 3300±109.27 <sup>a</sup>  | 854.18±51.47 <sup>b</sup>   | 742.97±34.56 <sup>bc</sup> |
|           | Biphenyl                            | 4.44±1.76 <sup>b</sup>   | 5.48±0.34 <sup>b</sup>    | 2.42±0.8 <sup>b</sup>       | 32.57±3.45 <sup>a</sup>    |
|           | Phenol                              | 516.2±45 <sup>c</sup>    | 392.52±32.12 <sup>d</sup> | 633.21±39.42 <sup>b</sup>   | 782.67±23.7 <sup>a</sup>   |
|           | p-Xylene                            | 94.2±17 <sup>b</sup>     | 60.79±9.32 <sup>c</sup>   | 27.35±3.21 <sup>d</sup>     | 1255.45±23.45 <sup>a</sup> |
|           | 2,4-Di-tert-butylphenol             | -                        | -                         | -                           | 847.42±19.87 <sup>a</sup>  |
|           | 4-Ethyl-phenol                      | 28.1±11 <sup>b</sup>     | -                         | 186.68±21.34 <sup>a</sup>   | -                          |
|           | Toluene                             | 1236.7±89 <sup>a</sup>   | -                         | -                           | -                          |
|           | Ethyl-benzene                       | 682.6±61 <sup>a</sup>    | -                         | 8.37±3.37 <sup>c</sup>      | 591.68±35.34 <sup>b</sup>  |
|           | 1,2-Dimethyl-benzene                | -                        | 165.14±14.62 <sup>b</sup> | -                           | 1288.78±89.97 <sup>a</sup> |
|           | 1-Methyl-4-(1-methylethenyl)benzene | -                        | -                         | 2366.46±134.39 <sup>a</sup> | 348.25±23.89 <sup>b</sup>  |
| Furans    | 2-Pentyl-furan                      | 2910.2±35 <sup>a</sup>   | 728.92±19.22 <sup>b</sup> | 204.75±12.22 <sup>d</sup>   | 451.85±34.65 <sup>c</sup>  |
|           | 2,3-Dihydro-benzofuran              | 95.6±11 <sup>c</sup>     | 164.13±16.32 <sup>b</sup> | 120.37±11.34 <sup>c</sup>   | 633.97±31.34 <sup>a</sup>  |
|           | 2-ethyl-Furan                       | 17697.6±198 <sup>a</sup> | 4667.1±42.21 <sup>b</sup> | 768.89±23.98 <sup>c</sup>   | -                          |
|           | 5-Methyl-2-propylfuran              | -                        | 363.79±23.56 <sup>b</sup> | -                           | 488.31±28.98 <sup>a</sup>  |
|           | 2-Ethyl-5-methyl-furan              | 712±56 <sup>a</sup>      | 64.4±5.43 <sup>b</sup>    | -                           | -                          |
| Others    | Hexadecane                          | -                        | -                         | 2078.36±67.35 <sup>a</sup>  | 1392.42±78.78 <sup>b</sup> |

|                          |                        |                           |                           |                             |
|--------------------------|------------------------|---------------------------|---------------------------|-----------------------------|
| Undecane                 | -                      | -                         | 917.59±35.63 <sup>a</sup> | 17.54±2.45 <sup>b</sup>     |
| Styrene                  | -                      | 110.05±8.92 <sup>b</sup>  | -                         | 1048.34±114.56 <sup>a</sup> |
| (E)-1-Phenylbutene       | -                      | -                         | -                         | 15.09±3.45 <sup>a</sup>     |
| 1-Heptadecene            | -                      | -                         | -                         | 29.54±3.78 <sup>a</sup>     |
| Naphthalene              | 2.07±0.8 <sup>b</sup>  | -                         | -                         | 259.87±23.35 <sup>a</sup>   |
| Anethole                 | 1354.8±35 <sup>b</sup> | -                         | 446.3±35.12 <sup>c</sup>  | 2034.06±33.45 <sup>a</sup>  |
| 1-Methyl-naphthalene,    | -                      | 271.24±23.24 <sup>a</sup> | -                         | 272.92±34.19 <sup>a</sup>   |
| Benzothiazole            | 24.9±4 <sup>b</sup>    | -                         | -                         | 288.72±24.89 <sup>a</sup>   |
| 1H-Indole                | 13.4±2 <sup>b</sup>    | 3.76±0.32 <sup>c</sup>    | -                         | 50.54±4.29 <sup>a</sup>     |
| Propanoic acid anhydride | -                      | -                         | -                         | 2308.38±34.28 <sup>a</sup>  |
| Phenanthrene             | -                      | 174.55±14.52 <sup>a</sup> | -                         | 12.13±2.14 <sup>b</sup>     |
| Dimethyl Trisulfide      | -                      | 262.84±21.17 <sup>a</sup> | 26.53±2.35 <sup>b</sup>   | -                           |
| Maltol                   | 1124.9±34 <sup>a</sup> | -                         | -                         | -                           |
| Camphene                 | 220±14 <sup>a</sup>    | 72.3±0 <sup>b</sup>       | -                         | -                           |
| D-Limonene               | 639.5±39 <sup>a</sup>  | -                         | -                         | -                           |
| 2-Methyl-thiophene       | 802.8±47 <sup>a</sup>  | -                         | -                         | -                           |

Note: Means with Different different lower case letters (a–d) in the same row indicates a significant difference ( $p < 0.05$ ).

Table S2 OAV of volatile substances identified in steamed soybean (SS), soybean fermented by BZ25 (SFB), natto made by GUTU09 (NMB), and natto fermented by two-strain (NMBB)

| Number | Name                                | Aroma description                       | RI     | ID          | Threshold<br>value (ug/L) <sup>a</sup> | OAV |     |      |      |
|--------|-------------------------------------|-----------------------------------------|--------|-------------|----------------------------------------|-----|-----|------|------|
|        |                                     |                                         |        |             |                                        | SS  | SFB | NMB  | NMBB |
| Amines |                                     |                                         |        |             |                                        |     |     |      |      |
| A1     | N,N-dimethyl-Methylamine            | Fish                                    | 2081.3 | MS, RI, Std | 8-23 <sup>d</sup>                      | -   | -   | 7-20 | -    |
| A2     | Formamide                           | Ammonium odour                          | 1155.7 | MS, RI      | n.f.                                   | -   | -   | -    | -    |
| A3     | 3-Methyl-butanamide                 | —                                       | 1917.7 | MS, RI      | n.f.                                   | -   | -   | -    | -    |
| A4     | Ethosuximide                        | —                                       | 2370.4 | MS, RI      | n.f.                                   | -   | -   | -    | -    |
| Esters |                                     |                                         |        |             |                                        |     |     |      |      |
| B1     | Hexanoic acid ethyl ester           | Fruit, pineapple,<br>banana aroma       | 1233.3 | MS, RI      | 55.3 <sup>b</sup>                      | < 1 | < 1 | 10   | 98   |
| B2     | Octanoic acid ethyl ester           | Cream, milk<br>Fragrance                | 1436   | MS, RI      | 13 <sup>c</sup>                        | 1   | 28  | 4    | 20   |
| B3     | Benzoic acid ethyl ester            | Camomile, flower,<br>celery, fruit      | 1676.6 | MS, RI      | 0.6 <sup>d</sup>                       | 193 | 239 | -    | 16   |
| B4     | 2-Methyl-propanoic acid ethyl ester | Fruity                                  | 969    | MS, RI      | 58 <sup>e</sup>                        | 49  | -   | 3    | 3    |
| B5     | 3-Methyl-butanoic acid ethyl ester  | Fruity, apple-like,,<br>strawberry-like | 1068.2 | MS, RI      | 7 <sup>c</sup>                         | -   | -   | -    | 2    |
| B6     | Hexadecanoic acid methyl ester      | Fruity, fermented<br>pear-like          | 1334.2 | MS, RI      | 4000000 <sup>f</sup>                   | -   | < 1 | -    | < 1  |
| B7     | 2-Methyl-butanoic acid ethyl ester  | Fruit, green, apples                    | 1053.1 | MS, RI      | 968-11700 <sup>g</sup>                 | -   | < 1 | < 1  | < 1  |
| B8     | Heptanoic acid ethyl ester          | Green, diversileaf                      | 1334.2 | MS, RI      | 13200 <sup>h</sup>                     | -   | < 1 | < 1  | < 1  |

|                  |                                                  |                                                       |        |             |                    |       |       |        |         |
|------------------|--------------------------------------------------|-------------------------------------------------------|--------|-------------|--------------------|-------|-------|--------|---------|
| B9               | Ethylphenyl acetate                              | artocarpus fruit<br>Flowery, fruit, cocoa<br>fragrant | 1793.5 | MS, RI      | 4300 <sup>g</sup>  | < 1   | < 1   | 1      | < 1     |
| B10              | 2,2,4-Trimethyl-1,3-pentanediol<br>diisobutyrate | —                                                     | 1879.9 | MS, RI      | 4000 <sup>d</sup>  | -     | -     | -      | < 1     |
| B11              | Benzeneacetic acid methyl ester                  | Jasmine flower, sweet,<br>fruit                       | 1767.6 | MS, RI      | 0.16 <sup>i</sup>  | -     | 1347  | 1171   | -       |
| B12              | Diethyl acetate                                  | Sweet, pineapple,<br>grape                            | 1381.6 | MS, RI      | 1500 <sup>f</sup>  | -     | -     | 2      | -       |
| B13              | $\gamma$ -Butyrolactone                          | Milk, cream flavor                                    | 1636.5 | MS, RI      | 35000 <sup>d</sup> | < 1   | -     | -      | -       |
| B14              | Ethanedioic acid diethyl ester                   | —                                                     | 1537.9 | MS, RI      | n.f.               | -     | -     | -      | -       |
| B15              | 2-Butenoic acid 2-propenyl ester                 | —                                                     | 1128   | MS, RI      | n.f.               | -     | -     | -      | -       |
| B16              | 4-Isobutylbutanolide                             | —                                                     | 1377.9 | MS, RI      | n.f.               | -     | -     | -      | -       |
| B17              | Oxirane-2-carboxylic acid ethyl ester            | —                                                     | 1812.7 | MS, RI      | n.f.               | -     | -     | -      | -       |
| <b>Pyrazines</b> |                                                  |                                                       |        |             |                    |       |       |        |         |
| C1               | Trimethyl-pyrazine                               | Nutty, cocoa-like,<br>roasted                         | 1407.7 | MS, RI      | 50-96 <sup>g</sup> | 40-77 | 36-90 | 62-119 | 171-328 |
| C2               | 2,5-Dimethyl-pyrazine                            | Cocoa, roasted nut,<br>roast beef                     | 1325.7 | MS, RI      | 1700 <sup>j</sup>  | 1     | 1     | 5      | 14      |
| C3               | 2-Ethyl-3,5-dimethyl-pyrazine                    | Roasted potato                                        | 1465   | MS, RI      | 7.5 <sup>b</sup>   | 2     | 74    | 182    | 10      |
| C4               | 2-Ethyl-5-methyl-pyrazine                        | Nutty                                                 | 1394.4 | MS, RI      | 16 <sup>k</sup>    | -     | 8     | 10     | 7       |
| C5               | Tetramethyl-pyrazine                             | Burnt coffee, grass                                   | 1478.3 | MS, RI      | 730 <sup>c</sup>   | -     | 1     | 2      | 5       |
| C6               | Pyrazine                                         | Rancid                                                | 1217.2 | MS, RI      | 900 <sup>d</sup>   | 2     | < 1   | -      | < 1     |
| C7               | Methyl-pyrazine                                  | Nutty, coffee, cocoa-                                 | 1270.6 | MS, RI, Std | 1900 <sup>d</sup>  | < 1   | 0     | < 1    | < 1     |



|                |                                 |                                   |        |        |                       |      |      |       |       |
|----------------|---------------------------------|-----------------------------------|--------|--------|-----------------------|------|------|-------|-------|
|                |                                 | like                              |        |        |                       |      |      |       |       |
| C8             | 2-Ethenyl-6-methyl-pyrazine     | Caramel, nutty,<br>roasted potato | 1495.6 | MS, RI | 40 <sup>d</sup>       | -    | < 1  | -     | 8     |
| C9             | 2,3,5-Trimethyl-6-ethylpyrazine | —                                 | 1516.3 | MS, RI | n.f.                  | -    | -    | -     | -     |
| <b>Ketones</b> |                                 |                                   |        |        |                       |      |      |       |       |
| D1             | 3-Hydroxy-2-butanone            | Fat milk                          | 1288.7 | MS, RI | 8000 <sup>g</sup>     | < 1  | 6    | 4     | 2     |
| D2             | 5-Methyl-2-hexanone             | —                                 | 1141.8 | MS, RI | 62-89 <sup>d</sup>    | 1    | 2-3  | 17-24 | 11-16 |
| D3             | 2,3-Hexadecanone                | Butter caramel fruit              | 2079.1 | MS, RI | 7.3 <sup>d</sup>      | 12   | 4    | 33    | 72    |
| D4             | 2,3-Butanedione                 | Sweet cream                       | 984.7  | MS, RI | 5 <sup>e</sup>        | -    | 33   | -     | 644   |
| D5             | 2-Nonanone                      | Sweet coconut                     | 1342.7 | MS, RI | 32 <sup>d</sup>       | 4    | 42   | 46    | 46    |
| D6             | 1-Phenyl-ethanone               | Almond                            | 1664   | MS, RI | 65 <sup>k</sup>       | < 1  | 1    | < 1   | 7     |
| D7             | 2-Heptanone                     | Mild medicinal<br>fragrance       | 1181.3 | MS, RI | 1 <sup>j</sup>        | 1287 | 2376 | 982   | -     |
| D8             | 3-Octanone                      | Herb, butter                      | 1251.9 | MS, RI | 1.3 <sup>g</sup>      | 602  | 24   | 172   | -     |
| D9             | 2,3-Pentanedione                | Caramel, nuts                     | 1061.6 | MS, RI | 30 <sup>d</sup>       | 6    | 11   | 7     | -     |
| D10            | Acetone                         | irritating flavors                | 819.8  | MS, RI | 1100 <sup>d</sup>     | 25   | 16   | 7     | -     |
| D11            | 2-Hydroxy-3-pentanone           | Truffle, earth, nuts              | 1361.7 | MS, RI | 3000 <sup>d</sup>     | -    | < 1  | < 1   | < 1   |
| D12            | 2,6-Dimethyl-4-heptanone        | —                                 | 1391   | MS, RI | 9300 <sup>d</sup>     | -    | < 1  | < 1   | < 1   |
| D13            | 1-(4-Methylphenyl)-ethanone     | —                                 | 1789.7 | MS, RI | 21 <sup>d</sup>       | 2    | < 1  | -     | < 1   |
| D14            | 3-Hydroxy-4-phenyl-2-butanone   | —                                 | 2275.8 | MS, RI | 750-1000 <sup>d</sup> | -    | -    | < 1   | < 1   |
| D15            | 4-Methyl-3-penten-2-one         | —                                 | 1132.8 | MS, RI | 200 <sup>k</sup>      | -    | 2    | < 1   | -     |
| D16            | 2-Butanone                      | Fruit green                       | 905.3  | MS, RI | 1300 <sup>g</sup>     | 2    | -    | 3     | -     |

|              |                                   |                              |        |             |                      |        |     |        |        |
|--------------|-----------------------------------|------------------------------|--------|-------------|----------------------|--------|-----|--------|--------|
| D17          | 3-Pentanone                       | Almond, malt,<br>pungent     | 918.9  | MS, RI      | 3000 <sup>d</sup>    | 3      | -   | -      | -      |
| D18          | 1-Octen-3-one                     | —                            | 1301.2 | MS, RI      | 1000 <sup>d</sup>    | 1      | -   | -      | -      |
| D19          | 6-Methyl-5-hepten-2-one           | Pepper, mushroom             | 1338.9 | MS, RI      | 68 <sup>d</sup>      | 16     | -   | -      | -      |
| D20          | 3-Hydroxy-2-methyl-4H-pyran-4-one | Caramel-like                 | 1977   | MS, RI, Std | 2500 <sup>d</sup>    | -      | -   | -      | 1      |
| D21          | 3-Hydroxy-3-methyl-2-butanone     | —                            | 1244.6 | MS, RI, Std | n.f.                 | -      | -   | -      | -      |
| D22          | 5-Methyl-2-heptanone              | —                            | 1256.4 | MS, RI      | n.f.                 | -      | -   | -      | -      |
| <b>Acids</b> |                                   |                              |        |             |                      |        |     |        |        |
| E1           | Acetic acid                       | Stimulative sour             | 1451.1 | MS, RI      | 13-150 <sup>g</sup>  | 13-485 | -   | 62-715 | 26-301 |
| E2           | 2-Ethyl-butanoic acid             | Fruit milchigs               | 1380.5 | MS, RI      | 93-460 <sup>d</sup>  | -      | -   | 6-29   | 1-7    |
| E3           | 2-Methyl-butanoic acid            | Fruit, sour, cheese          | 1667.7 | MS, RI      | 2200 <sup>d</sup>    | < 1    | < 1 | 2      | 2      |
| E4           | 2-Methyl-propanoic acid           | Pungent, rancid              | 1565.5 | MS, RI      | 1580 <sup>c</sup>    | < 1    | < 1 | 2      | 1      |
| E5           | (R)-(-)-4-Methylhexanoic acid     | —                            | 1923.5 | MS, RI      | 7300 <sup>d</sup>    | -      | < 1 | < 1    | < 1    |
| E6           | Octanoic acid                     | Rancidify                    | 2056.3 | MS, RI      | 2700 <sup>c</sup>    | < 1    | < 1 | < 1    | < 1    |
| E7           | Benzoic acid                      | Perfume pungent<br>odor      | 2444.6 | MS, RI      | 1000 <sup>g</sup>    | 8      | 7   | 3      | < 1    |
| E8           | Benzeneacetic acid                | Flowery, animal<br>fragrance | 2564.1 | MS, RI      | 1430 <sup>b</sup>    | -      | < 1 | < 1    | < 1    |
| E9           | Octadecanoic acid                 | —                            | 2719.4 | MS, RI      | 20000 <sup>d</sup>   | -      | -   | -      | < 1    |
| E10          | n-Hexadecanoic acid               | —                            | 2199.2 | MS, RI      | >100000 <sup>d</sup> | < 1    | -   | -      | -      |
| E11          | 3-Methyl-2-butenic acid           | —                            | 1796.9 | MS, RI      | 14000 <sup>d</sup>   | -      | < 1 | < 1    | -      |
| E12          | Hexanoic acid                     | Sour, sweaty spicy           | 1845.6 | MS, RI      | 2520 <sup>g</sup>    | < 1    | < 1 | < 1    | -      |
| E13          | Propanoic acid                    | Stimulative sour smell       | 1538.5 | MS, RI      | 1000 <sup>d</sup>    | -      | < 1 | < 1    | -      |

|                  |                           |                                  |        |             |                    |      |      |     |      |
|------------------|---------------------------|----------------------------------|--------|-------------|--------------------|------|------|-----|------|
| E14              | Formic acid               | Penetrating odor                 | 1502.5 | MS, RI      | 46000 <sup>d</sup> | < 1  | < 1  | -   | -    |
| E15              | 3-Methyl-butanoic acid    | Stimulative rancid odor          | 1670.2 | MS, RI      | 490 <sup>d</sup>   | 2    | 5    | -   | -    |
| E16              | 4-Methyl-pentanoic acid   | Rancid                           | 1803.4 | MS, RI      | 144 <sup>c</sup>   | < 1  | -    | < 1 | -    |
| E17              | 4-Hydroxy-butanoic acid   | —                                | 1645.6 | MS, RI, Std | n.f.               | -    | -    | -   | -    |
| <b>Aldehydes</b> |                           |                                  |        |             |                    |      |      |     |      |
| F1               | Decanal                   | Sweet, flowery wax fragrance     | 1502   | MS, RI      | 0.1 <sup>j</sup>   | 5510 | 3739 | -   | 6675 |
| F2               | Nonanal                   | flowery citrus, fat wax fragrant | 1396.1 | MS, RI      | 3.1 <sup>g</sup>   | 151  | 124  | 40  | 278  |
| F3               | 3-Methyl-butanal          | Malt,unpleasant smell            | 919.7  | MS, RI      | 31.6 <sup>d</sup>  | 505  | -    | 16  | -    |
| F4               | 2-Methyl-butanal          | Cocoa, almond                    | 916.3  | MS, RI      | 1 <sup>d</sup>     | -    | -    | 540 | -    |
| F5               | Octanal                   | Crude oil smell                  | 1284.6 | MS, RI      | 0.9 <sup>k</sup>   | 316  | -    | 120 | -    |
| F6               | Phenylacetaldehyde        | Fengxinzi taste                  | 1647   | MS, RI      | 4 <sup>k</sup>     | 108  | 41   | 30  | -    |
| F7               | Furfural                  | Sweet, bread, caramel-like aroma | 1466.3 | MS, RI      | 44000 <sup>c</sup> | < 1  | < 1  | -   | -    |
| F8               | Benzaldehyde              | Cherry nuts, bitter almond aroma | 1528.8 | MS,RI, Std  | 85 <sup>g</sup>    | 80   | 25   | 26  | -    |
| F9               | Hexanal                   | Grass, fat                       | 1082.9 | MS, RI      | 230 <sup>g</sup>   | 22   | < 1  | < 1 | -    |
| F10              | Heptanal                  | Strong fruit aroma               | 1182.9 | MS, RI      | 260 <sup>d</sup>   | 5    | -    | -   | -    |
| F11              | 2,4-Dimethyl-benzaldehyde | —                                | 1830.5 | MS, RI      | n.f.               | -    | -    | -   | -    |
| <b>Alcohols</b>  |                           |                                  |        |             |                    |      |      |     |      |

|     |                     |                                        |        |        |                      |     |     |       |     |
|-----|---------------------|----------------------------------------|--------|--------|----------------------|-----|-----|-------|-----|
| G1  | 1-Octen-3-ol        | Mushroom green<br>fragrance            | 1447.3 | MS, RI | 10 <sup>g</sup>      | 168 | 13  | 6     | 931 |
| G2  | Trans-geraniol      | Flowery, lemon<br>aroma                | 1845.3 | MS, RI | 1 <sup>f</sup>       | -   | 208 | -     | 189 |
| G3  | 3-Octanol           | Herbaceous, melon,<br>citrus-like odor | 1389.8 | MS, RI | 18 <sup>d</sup>      | -   | 7   | -     | 39  |
| G4  | 1-Hexanol           | Green, flowery                         | 1350.3 | MS, RI | 34 <sup>g</sup>      | -   | 52  | -     | 12  |
| G5  | 2-Ethyl-1-hexanol   | Rose, green                            | 1486.5 | MS, RI | 200 <sup>g</sup>     | -   | < 1 | -     | 4   |
| G6  | Ethanol             | Sweet, wine flavor                     | 937.2  | MS, RI | 620 <sup>g</sup>     | -   | -   | -     | 4   |
| G7  | 1-Nonanol           | Fat green aroma                        | 1656.7 | MS, RI | 45.5 <sup>d</sup>    | -   | -   | 3     | 2   |
| G8  | 3-Ethyl- 3-pentanol | —                                      | 1370.3 | MS, RI | 42-84 <sup>d</sup>   | -   | -   | -     | 0-1 |
| G9  | 2-Methyl-3-hexanol  | —                                      | 1370.8 | MS, RI | 46-81 <sup>d</sup>   | -   | -   | 11-19 | -   |
| G10 | 1-Butanol           | Spicy wine                             | 1146.9 | MS, RI | 2730 <sup>c</sup>    | -   | < 1 | < 1   | < 1 |
| G11 | 5-Methyl-2-hexanol  | —                                      | 1276.1 | MS, RI | 330-650 <sup>d</sup> | -   | -   | < 1   | < 1 |
| G12 | Phenylethyl alcohol | Honey, rose                            | 1918.4 | MS, RI | 12-21 <sup>g</sup>   | -   | -   | < 1   | < 1 |
| G13 | 1-Hexadecanol       | —                                      | 2374   | MS, RI | 1100 <sup>d</sup>    | -   | < 1 | -     | < 1 |
| G14 | 2-Heptanol          | Mushroom                               | 1316.3 | MS, RI | 1430 <sup>h</sup>    | -   | < 1 | -     | < 1 |
| G15 | 2,3-Butanediol      | Fruit, onion                           | 1538.5 | MS, RI | >100000 <sup>g</sup> | -   | < 1 | < 1   | < 1 |
| G16 | 1-Octanol           | Rose, citrus aroma                     | 1554.4 | MS, RI | 1100 <sup>h</sup>    | -   | -   | < 1   | < 1 |
| G17 | 1-Nonen-3-ol        | —                                      | 1532.4 | MS, RI | 1300 <sup>d</sup>    | -   | -   | -     | -   |
| G18 | Benzyl alcohol      | Sweet, flower                          | 1882.6 | MS, RI | 40900 <sup>c</sup>   | -   | -   | -     | < 1 |
| G19 | 2-Phenoxy-ethanol   | —                                      | 2151.9 | MS, RI | 690000 <sup>f</sup>  | -   | -   | < 1   | < 1 |

|                  |                                     |                             |        |             |                   |      |      |     |     |
|------------------|-------------------------------------|-----------------------------|--------|-------------|-------------------|------|------|-----|-----|
| G20              | Eucalyptol                          | —                           | 1206.7 | MS, RI, Std | 4.6 <sup>d</sup>  | 73   | -    | -   | -   |
| G21              | (Z)-3-Methyl-2-pentenol             |                             | 1320.3 | MS, RI, Std | n.f.              | -    | -    | -   | -   |
| <b>Aromatics</b> |                                     |                             |        |             |                   |      |      |     |     |
| H1               | 2-Methoxy-phenol                    | Spicy medicine<br>fragrance | 1869.1 | MS, RI      | 1.5 <sup>g</sup>  | 465  | 2200 | 569 | 495 |
| H2               | Biphenyl                            | —                           | 2005   | MS, RI      | 0.5 <sup>d</sup>  | 9    | 11   | 5   | 65  |
| H3               | Phenol                              | Phenol                      | 2010.6 | MS, RI      | 21 <sup>g</sup>   | 25   | 19   | 30  | 37  |
| H4               | p-Xylene                            | Plastic, pungent            | 1137.5 | MS, RI      | 1000 <sup>i</sup> | < 1  | < 1  | < 1 | 1   |
| H5               | 2,4-Ditert-butylphenol              | —                           | 2306.8 | MS, RI      | 500 <sup>d</sup>  | -    | -    | -   | 2   |
| H6               | 4-Ethyl-phenol                      | Musty                       | 1213.1 | MS, RI      | 51 <sup>d</sup>   | < 1  | -    | 4   | -   |
| H7               | Toluene                             | Paint                       | 1040.8 | MS, RI      | 527 <sup>d</sup>  | 2    | -    | -   | -   |
| H8               | Ethyl-benzene                       | —                           | 1121.9 | MS, RI      | 2205 <sup>i</sup> | < 1  | -    | < 1 | < 1 |
| H9               | 1,2-Dimethyl-benzene                | Geranium                    | 1182.8 | MS, RI      | n.f.              | -    | -    | -   | -   |
| H10              | 1-methyl-4-(1-methylethenyl)benzene | —                           | 1455.4 | MS, RI      | n.f.              | -    | -    | -   | -   |
| <b>Furans</b>    |                                     |                             |        |             |                   |      |      |     |     |
| I1               | 2-Pentyl-furan                      | Bean, green                 | 1230.1 | MS, RI      | 5.8 <sup>j</sup>  | 502  | 126  | 35  | 78  |
| I2               | 2,3-Dihydro-benzofuran              | —                           | 2399   | MS, RI      | 48 <sup>d</sup>   | 2    | 3    | 3   | 13  |
| I3               | 2-Ethyl-furan                       | Malt fragrance              | 957.3  | MS, RI      | 2.3 <sup>j</sup>  | 7694 | 2029 | 334 | -   |
| I4               | 5-Methyl-2-propylfuran              | —                           | 1577.9 | MS, RI      | n.f.              | -    | -    | -   | -   |
| I5               | 2-ethyl-5-methyl-Furan              | —                           | 1035.1 | MS, RI      | n.f.              | -    | -    | -   | -   |
| <b>Others</b>    |                                     |                             |        |             |                   |      |      |     |     |
| J1               | Hexadecane                          | Alkane                      | 1405   | MS, RI, Std | 25 <sup>j</sup>   | -    | -    | 84  | 56  |
| J2               | Undecane                            | Alkane                      | 1090.5 | MS, RI, Std | 1578 <sup>j</sup> | -    | -    | < 1 | < 1 |

|     |                          |                                 |        |             |                          |     |     |   |     |
|-----|--------------------------|---------------------------------|--------|-------------|--------------------------|-----|-----|---|-----|
| J3  | Styrene                  | Balsamic, gasoline              | 1259.6 | MS, RI      | 65 <sup>d</sup>          | 2   | 2   | - | 16  |
| J4  | (E)-1-Phenylbutene       | —                               | 1519.6 | MS, RI      | 150 <sup>d</sup>         | -   | -   | - | < 1 |
| J5  | 1-Heptadecene            | —                               | 2578.4 | MS, RI      | 8000 <sup>d</sup>        | -   | -   | - | < 1 |
| J6  | Naphthalene              | —                               | 1757.7 | MS, RI      | 6 <sup>d</sup>           | -   | -   | - | 43  |
| J7  | Anethole                 | Fennel, spicy Licorice<br>smell | 1839   | MS, RI      | 100 <sup>f</sup>         | -   | -   | 4 | 20  |
| J8  | 1-Methyl-naphthalene     | Naphthalene<br>camphor aroma    | 1870.8 | MS, RI      | 58.1 <sup>i</sup>        | 5   | 5   | - | 5   |
| J9  | Benzothiazole            | Coffee, meat flavor             | 1975   | MS, RI      | 80 <sup>d</sup>          | -   | -   | - | 4   |
| J10 | 1H-Indole                | Mothball, burnt,<br>flowery     | 2461.7 | MS, RI      | 40 <sup>i</sup>          | < 1 | < 1 | - | 1   |
| J11 | Propanoic acid anhydride | —                               | 1800.5 | MS, RI      | 3400 <sup>d</sup>        | -   | -   | - | < 1 |
| J12 | Phenanthrene             | —                               | 2750.4 | MS, RI, Std | 55-60 <sup>d</sup>       | 3   | 3   | - | < 1 |
| J13 | Dimethyl trisulfide      | Sulfuric, strong onion<br>odor  | 1380.1 | MS, RI      | 14 <sup>g</sup>          | 19  | 19  | 2 | -   |
| J14 | Maltol                   | Sweet malt aroma                | 2069.6 | MS, RI      | 210 <sup>d</sup>         | 5   | -   | - | -   |
| J15 | Camphene                 | Camphor                         | 1066   | MS, RI      | 26000-30000 <sup>d</sup> | < 1 | < 1 | - | -   |
| J16 | D-Limonene               | Lemon, citrus, sweet            | 1189.7 | MS, RI      | n.f.                     | -   | -   | - | -   |
| J17 | 2-Methyl-thiophene       | Sulfur                          | 1091.6 | MS, RI      | n.f.                     | -   | -   | - | -   |

Note: a: Odor thresholds were determined in water. Odor thresholds were taken from reference. <sup>b</sup>Odor thresholds taken from Ref. [1]; <sup>c</sup>Odor thresholds taken from Ref. [2]; <sup>d</sup>Odor thresholds taken from Ref. [3]; <sup>e</sup>Odor thresholds taken from Ref. [4]; <sup>f</sup>Odor thresholds taken from Ref. [5]; <sup>g</sup>Odor thresholds taken from Ref. [6]; <sup>h</sup>Odor thresholds taken from Ref. [7]; <sup>i</sup>Odor thresholds taken from Ref. [8]; <sup>j</sup>Odor thresholds taken from Ref. [9]; <sup>k</sup>Odor thresholds taken from Ref. [10]. OAV: Odor activity value; ID: Identification basis; MS: mass spectrometry; RI: retention index; Std: authentic standards; “n.f.”, “—”:Data was not found in literatures;

## References

1. Zheng, Y.; Sun, B.; Zhao, M.; Zheng, F.; Huang, M.; Sun, J.; Sun, X.; Li, H. Characterization of the key odorants in chinese Zhima aroma-type Baijiu by gas chromatography-olfactometry, quantitative measurements, aroma recombination, and omission studies. **2016**, *64*, 5367-5374. <https://doi.org/10.1021/acs.jafc.6b01390>.
2. Li, H.; Qin, D.; Wu, Z.; Sun, B.; Sun, X.; Huang, M.; Sun, J.; Zheng, F. Characterization of key aroma compounds in Chinese Guojing sesame-flavor Baijiu by means of molecular sensory science. **2019**, *284*, 100-107. <https://doi.org/10.1016/j.foodchem.2019.01.102>.
3. L.J. van Gemert, Z. Complilations of odour threshold values in air, water and other media[M]. The Netherlands: Oliemans Punter & Partners BV. **2003**.
4. Sun, J.; Li, Q.; Luo, S.; Zhang, J.; Huang, M.; Chen, F.; Zheng, F.; Sun, X.; Li, H. Characterization of key aroma compounds in Meilanchun sesame flavor style baijiu by application of aroma extract dilution analysis, quantitative measurements, aroma recombination, and omission/addition experiments. **2018**, *8*, 23757-23767. <https://doi.org/10.1039/c8ra02727g>.
5. Shi, J.; Tong, G.; Yang, Q.; Huang, M.; Ye, H.; Liu, Y.; Wu, J.; Zhang, J.; Sun, X.; Zhao, D. Characterization of key aroma compounds in tartary buckwheat (*fagopyrum tataricum gaertn.*) by means of sensory-directed flavor analysis. **2021**, *69*, 11361-11371. <https://doi.org/10.1021/acs.jafc.1c03708>.
6. Chen, Y.; Li, P.; Liao, L.; Qin, Y.; Jiang, L.; Liu, Y. Characteristic fingerprints and volatile flavor compound variations in Liuyang Douchi during fermentation via HS-GC-IMS and HS-SPME-GC-MS. **2021**, *361*, 130055. <https://doi.org/10.1016/j.foodchem.2021.130055>.
7. Zhao, D.; Shi, D.; Sun, J.; Li, A.; Sun, B.; Zhao, M.; Chen, F.; Sun, X.; Li, H.; Huang, M., et al. Characterization of key aroma compounds in Gujinggong Chinese Baijiu by gas chromatography-olfactometry, quantitative measurements, and sensory evaluation. **2018**, *105*, 616-627. <https://doi.org/10.1016/j.foodres.2017.11.074>.
8. Guo, X.; Ho, C.-T.; Schwab, W.; Wan, X. Effect of the roasting degree on flavor quality of large-leaf yellow tea. **2021**, *347*, 129016. <https://doi.org/10.1016/j.foodchem.2021.129016>.
9. Gu, S.-q.; Wang, X.-c.; Tao, N.-p.; Wu, N. Characterization of volatile compounds in different edible parts of steamed Chinese mitten crab (*Eriocheir sinensis*). **2013**, *54*, 81-92. <https://doi.org/10.1016/j.foodres.2013.05.018>.
10. Zhu, J.; Niu, Y.; Xiao, Z. Characterization of the key aroma compounds in Laoshan green teas by application of odour activity value (OAV), gas chromatography-mass spectrometry-olfactometry (GC-MS-O) and comprehensive two-dimensional gas chromatography mass spectrometry (GC x GC-qMS). **2021**, *339*, 128136. <https://doi.org/10.1016/j.foodchem.2020.128136>.
